# Supplementary material for: Intracellular IL-32 regulates mitochondrial metabolism, proliferation, and differentiation of malignant plasma cells
Source: PubMed Central journal article supplement (PMC8717606; doi:10.1016/j.isci.2021.103605), 2021-12-13
Supplement: mmc1.pdf [file mmc1.pdf]

## **Supplemental information**

### **Intracellular IL-32 regulates mitochondrial metabolism, proliferation, and differentiation of malignant plasma cells**

**Kristin Roseth Aass, Robin Mjelle, Martin H. Kastnes, Synne S. Tryggestad, Luca M. van den Brink, Ingrid Aass Roseth, Marita Westhrin, Muhammad Zahoor, Siv H. Moen, Tonje M. Vikene Nedal, Glenn Buene, Kristine Misund, Anne-Marit Sponaas, Qianli Ma, Anders Sundan, Richard WJ. Groen, Tobias S. Slørdahl, Anders Waage, and Therese Standal**

**A**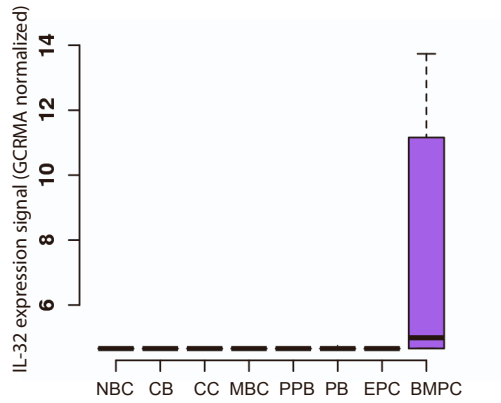**B**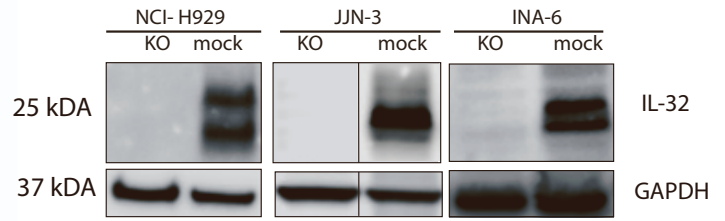**C**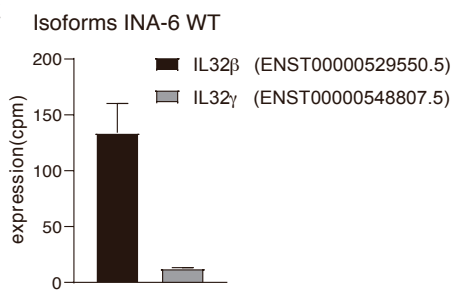**D**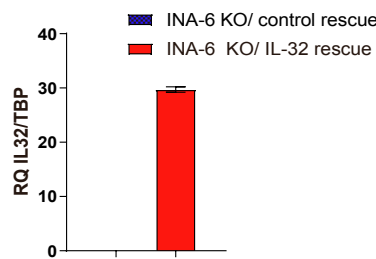**E**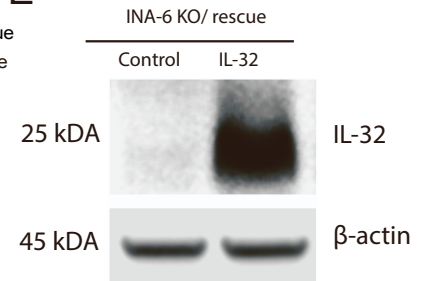**F**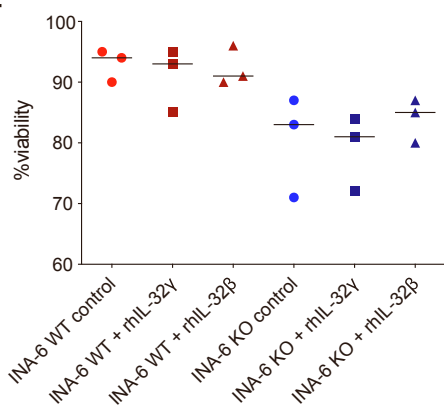**G**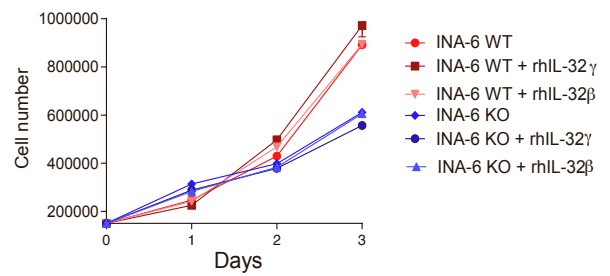**H**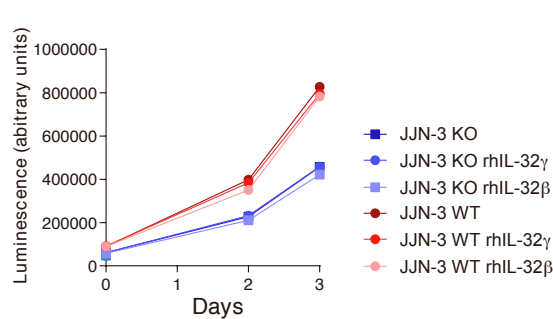**I**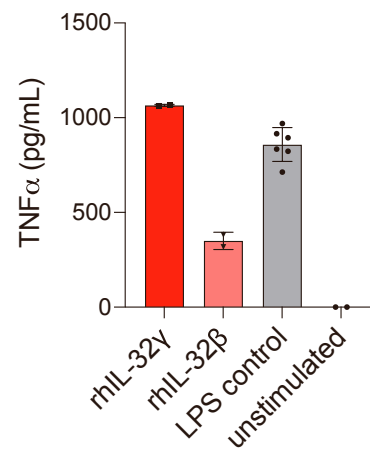

**Figure S1: IL-32 expression in B-cell subtypes, IL-32 CRISPR KO/knock-in validation, isoform expression and rhIL-32 rescue stimulation experiments and biological activity. Related to Figure 1.**

(A) IL-32 gene expression analyzed in Affymetrix microarray data (GCRMA normalized) of B cell subtypes derived from healthy individuals publicly available at GenomicScape.com (ID: GS-DT-2). NBC: naïve B cells (n=5), CB: centroblasts (n=4), CC: centrocytes (n=4), MBC: memory B cells (n=5), PPB: preplasmablasts (n=5), PB: plasmablasts (n=5), EPC: early plasma cells (n=5), BMPC: bone marrow plasma cells (n=5). (B) H929, JJN-3 and INA-6 IL-32 KO cells were generated by CRISPR/Cas9 gene editing, using lentiviral transduction (H929) and plasmid transfection (JJN3 and INA-6). Efficiency of IL32 knockout was evaluated by western blotting of IL-32. Vertical line indicates that the blot was cut to align the lanes of interest. (C) IL-32 isoforms in RNA-sequenced INA-6 WT mock cells analyzed by Kalisto in R. The Ensembl transcript ID is shown in brackets. (D) INA-6 KO/IL-32 rescue cells or rescue control cells were generated by transducing IL-32 KO cells with an IL-32 lentiviral vector or control vector, respectively. IL-32 mRNA in the cells were assessed by qPCR. Mean $\pm$  SD of technical replicates of one representative of 3 experiments is shown. (E) Knock-in efficiency in INA-6 KO IL-32 rescue cells evaluated by western blot of IL-32. (F) Viability of INA-6 KO and WT mock cells treated with rhIL-32 isoforms  $\beta$  and  $\gamma$  (100 ng/mL) overnight evaluated by trypan blue staining. The mean  $\pm$  SEM for 3 independent experiments is shown. Statistical significance was evaluated by two-way ANOVA and Dunnett's multiple comparisons test for F-H. There were no significant differences. (G) INA-6 KO and WT mock cells were treated with rhIL-32 isoforms  $\beta$  and  $\gamma$  (100 ng/mL) and proliferation was evaluated by automated cell counting for 3 days. Each time point shows the mean  $\pm$  SD of two technical replicates. (H) JJN-3 KO and WT mock cell proliferation with and without medium supplementation of rhIL-32 isoforms  $\beta$  and  $\gamma$  (100 ng/mL) was assessed by CTG assay. Arbitrary units were normalized to values at day 0 for each cell line. Each time point shows the mean  $\pm$  SD of 3 technical replicates. (I) Biological activity of rhIL-32 (100 ng/mL) as evaluated by secretion of TNF $\alpha$  from primary macrophages. Mean  $\pm$  SD of technical replicates of one experiment is shown.

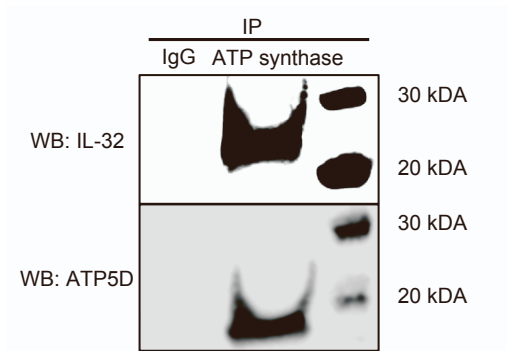

**Figure S2: IL-32 detection in ATP synthase pulldown. Related to Figure 2.**

CO-IP was performed by pulldown of the ATP synthase complex in INA-6 cells and IL-32 and ATP5D were detected by immunoblotting. Figure shows one representative immunoblot of 3 independent experiments.

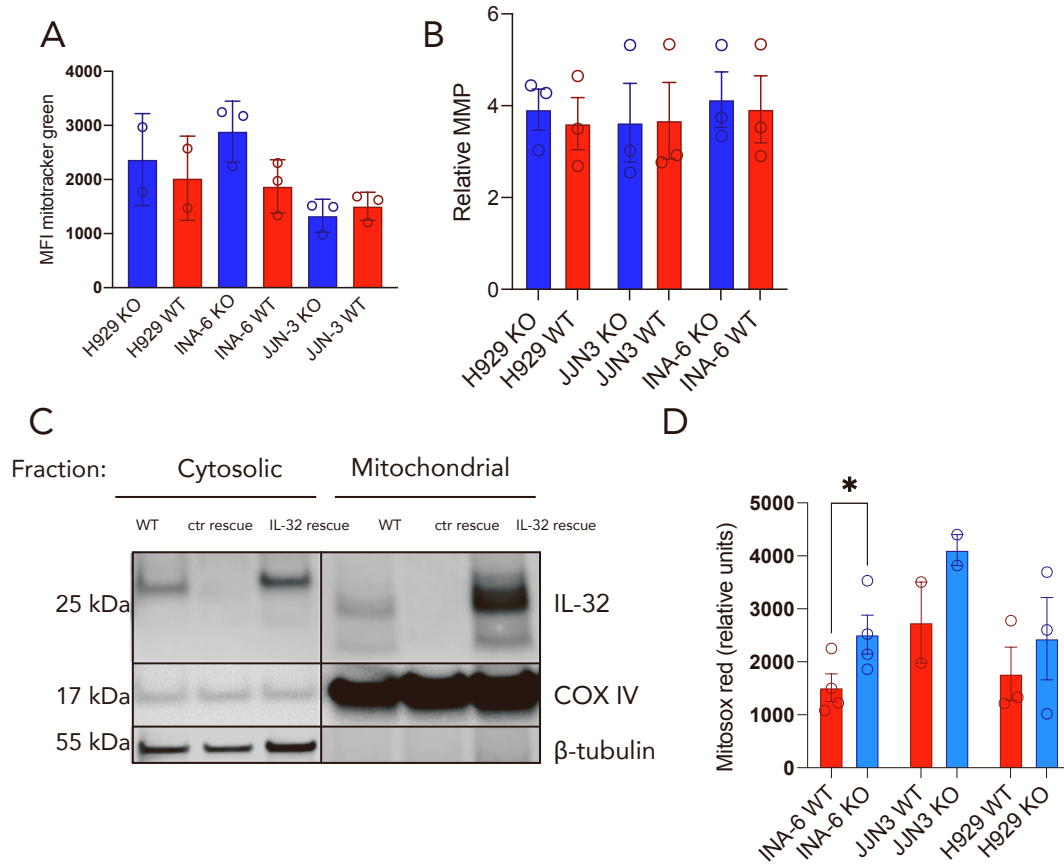

**Figure S3: Mitochondrial mass, mitochondrial membrane potential and mitochondrial ROS in IL-32 KO cell lines and isolated mitochondria. Detection of IL-32 in the mitochondrial fraction of INA-6 IL-32 KO/rescue cells. Related to Figure 3.**

**(A)** Mitochondrial mass in IL-32 KO and WT cell lines quantified by mitotracker green.

Data shown are mean  $\pm$  SEM of 3 independent experiments. The differences were not significant.

**(B)** Relative mitochondrial membrane potential (MMP) in myeloma IL-32 KO and WT cell lines quantified by TMRM/ mitotracker green flow cytometry. The results are presented as mean  $\pm$  SEM of 3 independent experiments. There were no significant differences.

**(C)** Immunoblot of IL-32 in mitochondrial and cytosolic fraction of INA-6 KO/ IL-32 rescue cells and INA-6 KO/rescue control cells.

**(D)** Mitochondrial ROS in isolated mitochondria from myeloma KO and WT cell lines quantified by MitoSox Red. The results are presented as the mean  $\pm$  SEM of biological replicates.

P-values in A, B and D were analyzed by unpaired Student's t-test. \*  $P \leq 0.05$

A

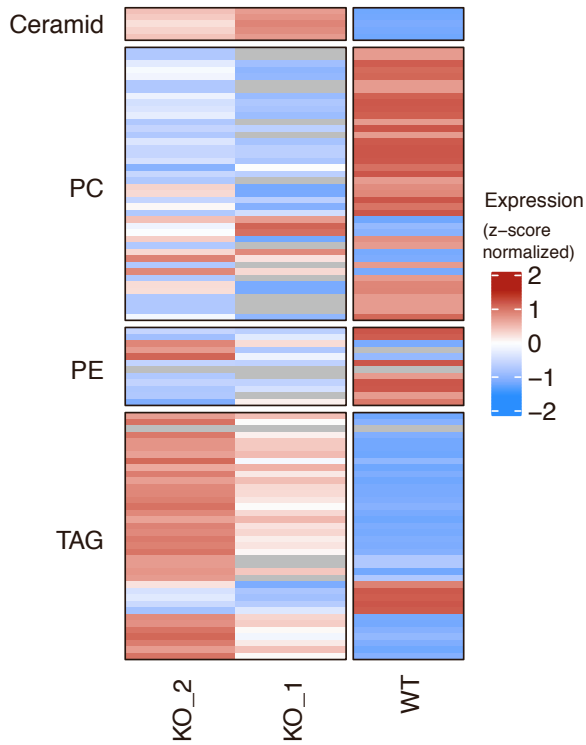

B

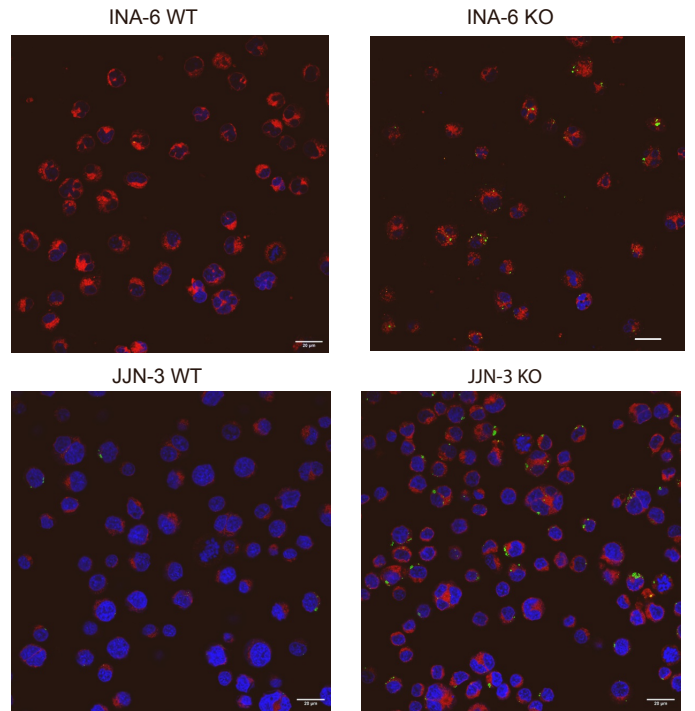

C

Upregulated in KO cells

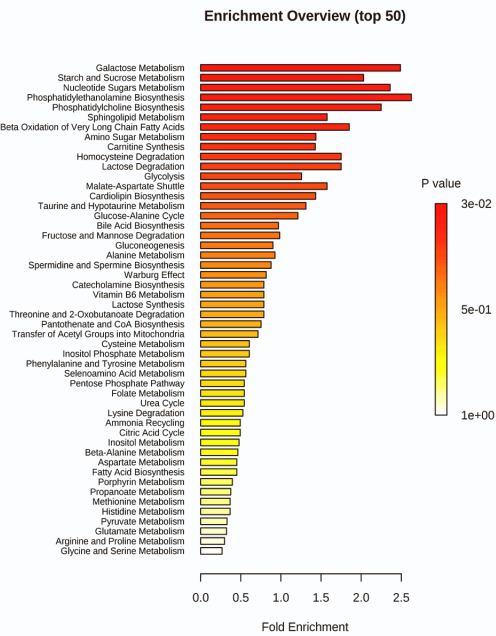

Downregulated in KO cells

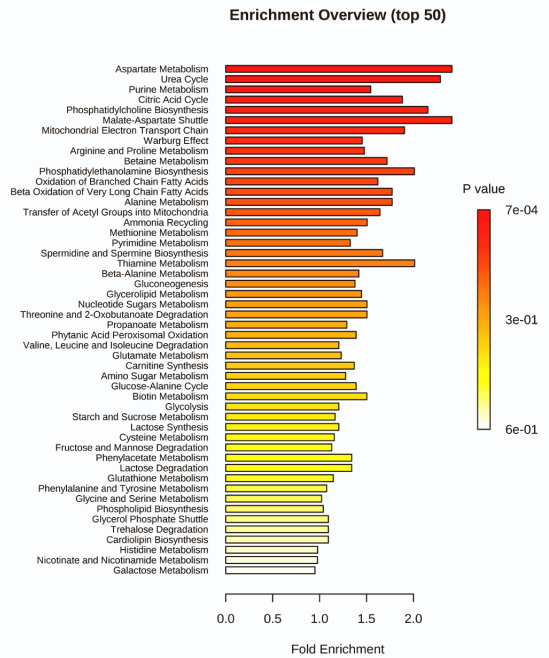

**Figure S4. Heatmap of differentially expressed lipid species between INA-6 KO and WT cells. Lipid droplet staining of IL-32 KO cells and pathway enrichment analysis of differentially expressed metabolites between KO and WT cells. Related to Figure 4.**

**(A)** Heatmap showing significantly altered ceramides, phosphatidylcholine (PC), phosphatidylethanolamine (PE) and triglyceride (TAG) species in two INA-6 KO clones (KO1, KO2) and WT mock cells. The details on the lipid species within each class can be found in Table S1. **(B)** Lipid droplets in INA-6 and JJN-3 KO and WT mock cells, stained with Nile Red. Polar lipids (red) were excited at 590 nm (600–700 nm) and neutral lipids (green) at 488 nm (500–580 nm). Hoechst stain of nucleus in blue. Confocal imaging was performed with a Leica TCS SP8 STED 3X using a 63X 1.4 (oil) objective and LAS X software. Scale bar: 20  $\mu$ M. **(C)** Pathway enrichment of significantly downregulated and upregulated metabolites (See Table S1) in INA-6 KO cells compared to WT cells using Metaboanalyst 4.0.

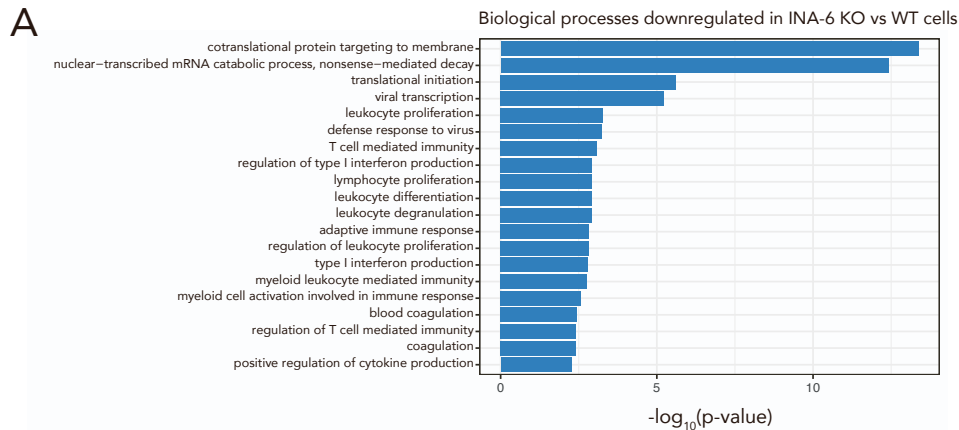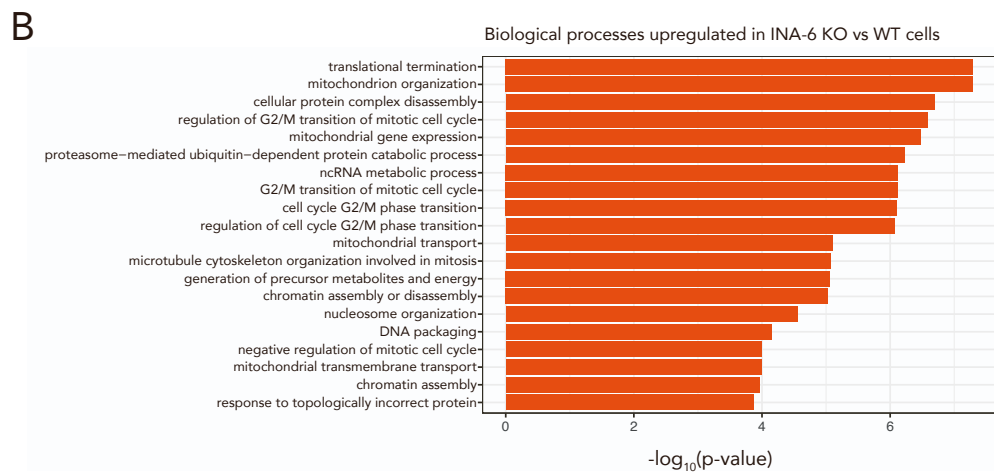

**Figure S5: Gene ontology (GO) enrichment analysis of differentially expressed genes between INA-6 IL-32 KO and WT cells. Related to Figure 4.**

GO-analysis of the differentially expressed genes (Benjamini-Hochberg-adjusted P-value < 0.05; log<sub>2</sub> fold change >0 and <0 for up- and -down-regulated genes, respectively) between INA-6 KO and WT mock cell lines. The figures show the top 20 significantly enriched biological processes downregulated (**A**) or upregulated (**B**) in KOs vs WT mock. The GO terms are ordered by the Benjamini-Hochberg adjusted P-values.



**A**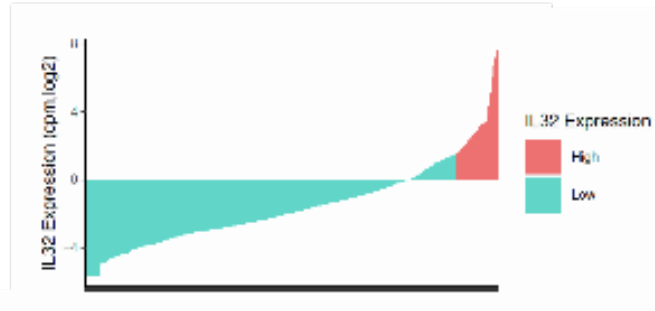**B**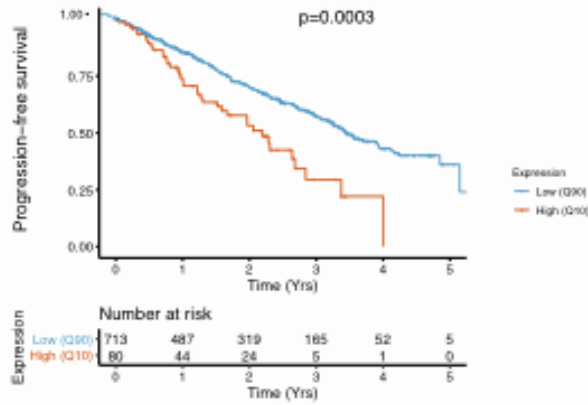**C**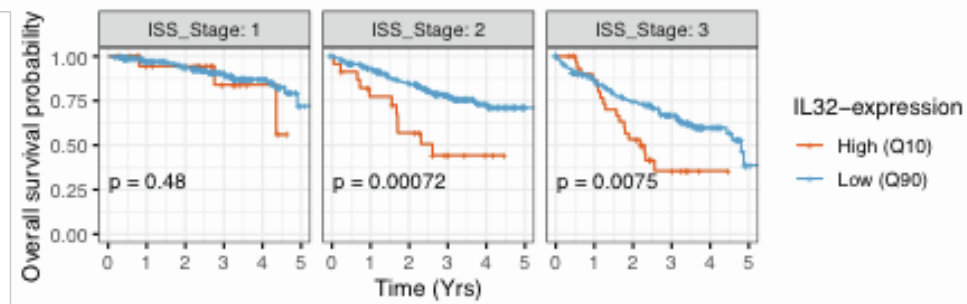**D**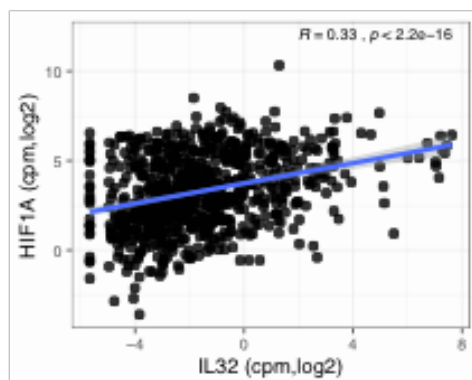**E**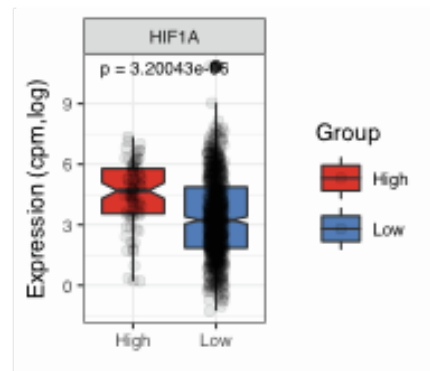

**Figure S6: IL-32 is an independent prognostic factor and associated with HIF1A in patients. Related to Figure 5.**

**(A)** IL-32 expression in all patients from CoMMpass IA13 (n= 792), upper 10th percentile (n= 80, log<sub>2</sub> cpm> 1.52) colored in pink. **(B)** Progression- free survival of IL-32 expressing patients (10<sup>th</sup> percentile) compared to nonexpressing patients (90<sup>th</sup> percentile) in the IA13 CoMMpass dataset P= 0.0003, using Cox proportional-hazards regression model. **(C)** Assessment of IL-32 as an independent prognostic factor for overall survival in IA13. IL-32 expressing patients (10<sup>th</sup> percentile) compared to non-expressing patients (90<sup>th</sup> percentile) at different ISS stages (stage I, stage II, or stage III disease). Adjustment for ISS stage was performed using multivariate Cox-regression, using the coxph function in R. **(D)** Correlation between IL-32 and HIF1A in CoMMpass IA13, evaluated by Pearson correlation coefficient. **(E)** HIF1A gene expression in IL-32-expressing patients (upper 10<sup>th</sup> percentile) compared to non-expressing patients (lower 90<sup>th</sup> percentile) in CoMMpass IA13. Significance was determined by limma in R.

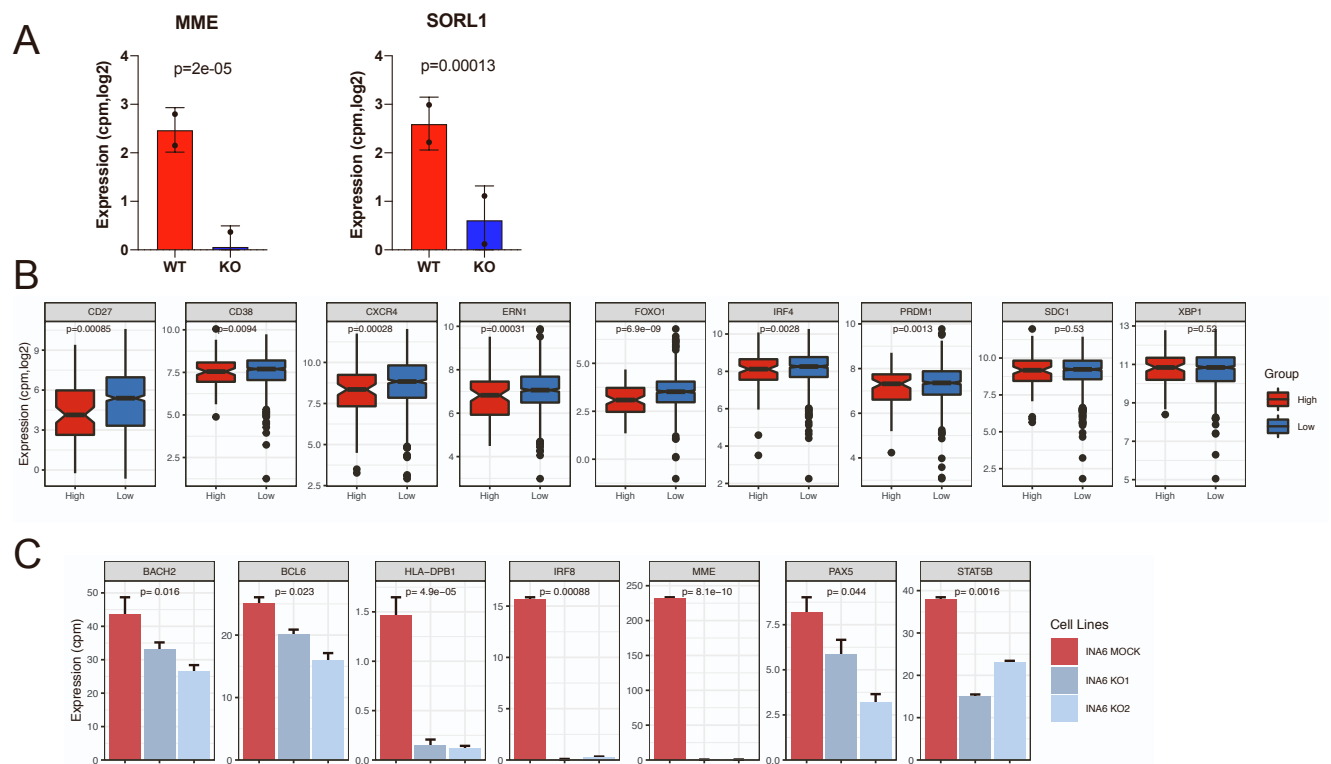

**Figure S7: IL-32 expression is associated with an immature phenotype. Related to Figure 7.**

**(A)** Gene expression of MME and SORL1 in H929 IL-32 KO and WT mock cells. Significance calculated by limma t-test with Benjamini-Hochberg-adjusted p-values in R.

**(B)** Evaluation of gene expression of typical mature plasma cell markers (based on a literature search) in IL-32 expressing patients (upper 10<sup>th</sup> percentile) compared to non-expressing patients (lower 90<sup>th</sup> percentile) in CoMMpass IA13. Significance analyzed by limma in R.

**(C)** Genes associated with less differentiated stages of B-cell maturation downregulated in INA-6 KO cells assessed from RNA-sequencing data of INA-6 KO1, KO2 and WT mock cells. P-values analyzed by limma in R.
